# Supplementary material for: Short-term impact of the smokefree legislation in England on emergency hospital admissions for asthma among adults: a population-based study
Source: HighWire-hosted journal article supplement (doi:10.1136/thoraxjnl-2012-202841), 2013-04-15
Supplement: thoraxjnl-2012-202841supp_appendix.pdf [file thoraxjnl-2012-202841supp_appendix.pdf]

**Short-term impact of the smokefree legislation in England on hospital admissions for  
asthma among adults: a population-based study**

Michelle Sims, Roy Maxwell and Anna Gilmore

**Online Data Supplement**

**Table S1. Sensitivity analysis - varying the post-legislation period<sup>1</sup>**

| Length of post-legislation period (years) | Smokefree effect (% change) |             |
|-------------------------------------------|-----------------------------|-------------|
|                                           | Estimate                    | 95% CI      |
| 1                                         | -7.4                        | -11.8, -2.8 |
| 2                                         | -7.8                        | -11.6, -3.8 |
| 3                                         | -4.6                        | -8.8, -0.3  |
| 3.5 <sup>2</sup>                          | -4.9                        | -9.0, -0.6  |

<sup>1</sup> length of pre-legislation period = 10.25 years

<sup>2</sup> original length of post-legislation period

**Table S2. Sensitivity analysis - varying the pre-legislation period<sup>1</sup>**

| Length of pre-legislation period (years) | Smokefree effect (% change) |             |
|------------------------------------------|-----------------------------|-------------|
|                                          | Estimate                    | 95% CI      |
| 6                                        | -3.2                        | -8.1, 1.9   |
| 7                                        | -5.4                        | -9.8, -0.8  |
| 8                                        | -5.9                        | -10.1, -1.5 |
| 9                                        | -5.2                        | -9.4, -0.7  |
| 10                                       | -4.8                        | -9.0, -0.5  |
| 10.25 <sup>2</sup>                       | -4.9                        | -9.0, -0.6  |

<sup>1</sup> length of post-legislation period = 3.5 years

<sup>2</sup> original length of pre-legislation period
